# Supplementary material for: Redundant Function of REV-ERBα and β and Non-Essential Role for Bmal1 Cycling in Transcriptional Regulation of Intracellular Circadian Rhythms
Source: PLOS journal article supplement (doi:10.1371/journal.pgen.1000023), 2008-02-29
Supplement: S1 (10.1371/journal.pgen.1000023.s001) [file journal.pgen.1000023.s001]

## Supporting Information

### Supplemental Figure S1

**Figure S1. *Ror* and *Rev-erb* expression patterns and *Rorc*<sup>-/-</sup> mouse behavioral rhythms.**

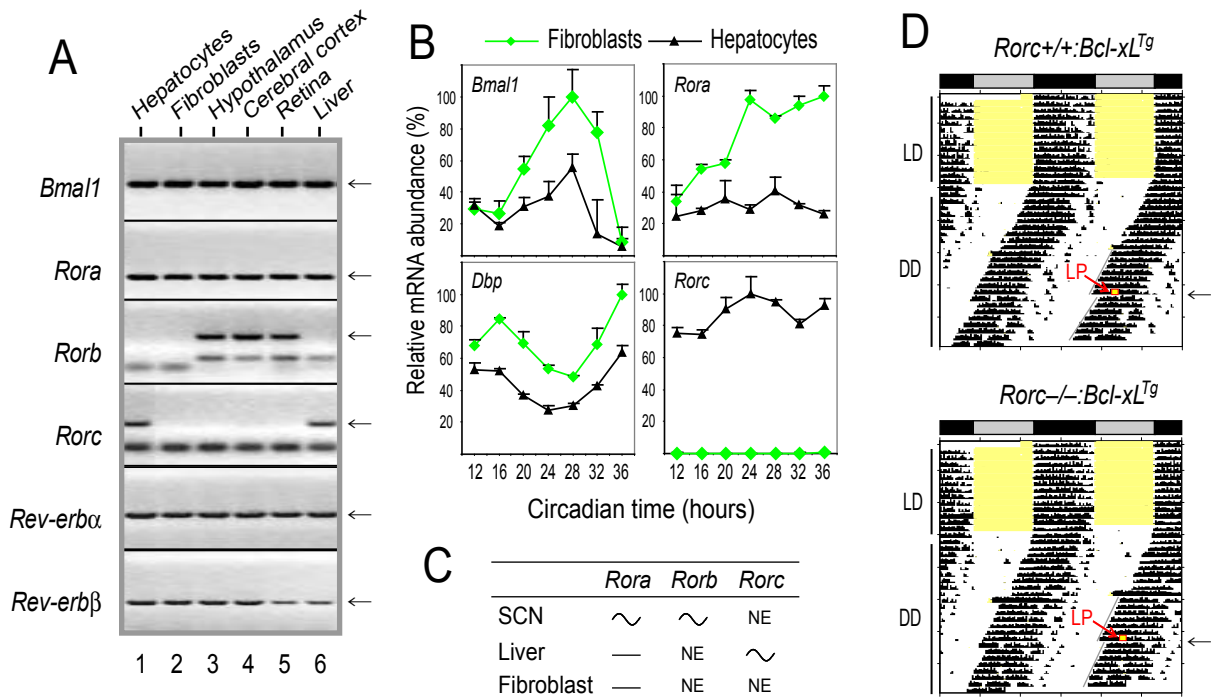

(A) Tissue-specific expression of the *Ror* and *Rev-erb* genes. Total RNA was isolated from the tissues indicated, and gene expression was determined by standard reverse transcription and PCR (RT-PCR) followed by agarose gel electrophoresis.

(B) Temporal mRNA expression profiles of *Bmal1*, *Dbp*, *Rora* and *Rorc* in wild-type fibroblasts and hepatocytes. Expression was analyzed at 4-hr intervals by quantitative PCR (Q-PCR). Values are expressed as percentage of maximum expression for each gene. Error bars represent standard deviation (SD) of expression levels from two culture samples. Circadian time: hours after serum treatment.

(C) Summary of *Rora*, *Rorb* and *Rorc* expression in the SCN, liver, and fibroblasts. Curved line: rhythmic expression. Flat line: arrhythmic expression. NE: not expressed or expression not detected. Note that in fibroblasts, *Rorb* and *Rorc* are not detected, and *Rora* expression is arrhythmic. *Rorc* is not expressed in the SCN, but is rhythmically expressed in liver.

(D) Double-plot actograms for *Bcl-xL*<sup>Tg</sup> controls and homozygous *Rorc*<sup>-/-</sup>:*Bcl-xL*<sup>Tg</sup> mice. *Rorc*<sup>-/-</sup> mice displayed normal circadian locomotor activity under constant darkness and normal phase shifts in response to a light pulse, compared to controls. Yellow shading represents the light period of LD cycles. Red arrows indicate a light pulse applied at CT16.
